# Supplementary material for: GluN2B and GluN2D NMDARs dominate synaptic responses in the adult spinal cord
Source: PubMed Central journal article supplement — Sci Rep. 2014 Feb 13;4:4094. doi: 10.1038/srep04094 (PMC3923208; doi:10.1038/srep04094), 2014-02-13
Supplement: srep04094-s1.pdf [file srep04094-s1.pdf]

Supplementary Information for:

GluN2B and GluN2D NMDARs dominate synaptic responses in the adult spinal cord

**Authors:**

<sup>1,2\*</sup> Michael E. Hildebrand, <sup>1,2</sup> Graham M. Pitcher, <sup>1,2</sup> Erika Harding, <sup>1,2</sup> Hongbin Li, <sup>1,2</sup> Simon Beggs, <sup>1,2</sup> Michael W. Salter

**Author Addresses:**

1. Program in Neurosciences & Mental Health, Hospital for Sick Children, Toronto, ON, Canada

2. Department of Physiology, University of Toronto, Toronto, ON, Canada

\*Current Address: Department of Neuroscience, Carleton University, Ottawa, ON, Canada

**Corresponding Author:**

Michael W. Salter

Program in Neurosciences & Mental Health, Hospital for Sick Children

Room 5018, 555 University Avenue

M5G 1X8

Phone: 416-813-5756

Fax: 416-813-7921

Email: [mike.salter@utoronto.ca](mailto:mike.salter@utoronto.ca)

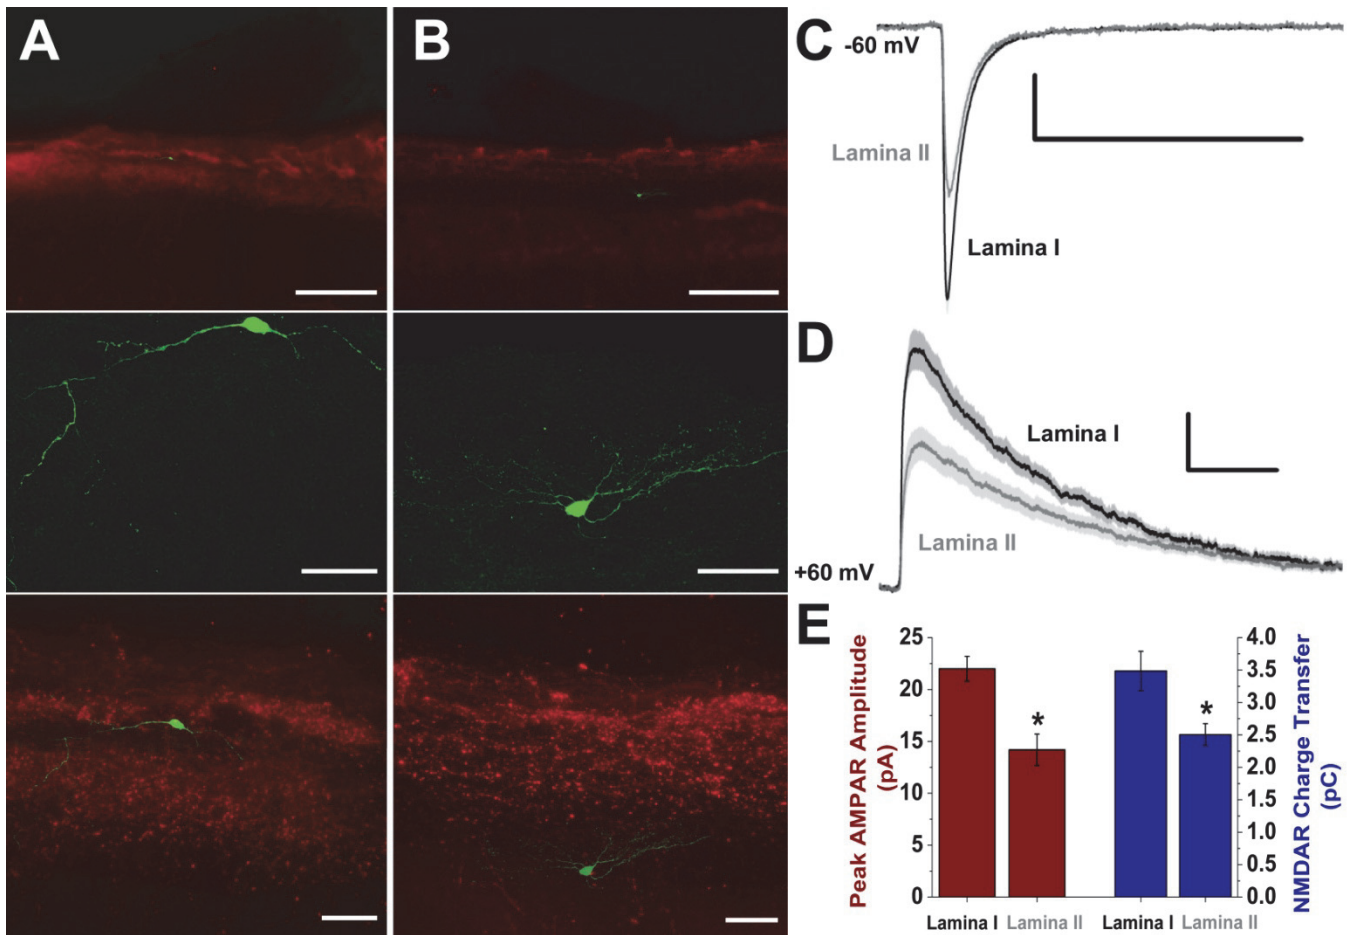

**Supplementary Figure 1: Both AMPAR- and NMDAR- mEPSCs are significantly larger in lamina I neurons compared to lamina II neurons.**

**A,B)** Representative images illustrating the location of a recorded lamina I neuron (**A**) and a recorded lamina II neuron (**B**) under both 50 x (*top*) and 200 x (*bottom*) magnification. The two-photon images of the lucifer yellow-filled neurons (*middle*) were manually scaled and superimposed onto epi-fluorescence stacks of slices fixed and stained for CGRP (red) labelling. Note the location of the lamina I neuron (*left*) in the dorsal region of CGRP staining and the location of the lamina II<sub>inner</sub> neuron outside the CGRP stained dorsal horn region (*right*). Scale bars = 300  $\mu$ m, 50  $\mu$ m, and 100  $\mu$ m for top, middle, and bottom panels, respectively. **C)** *Left*, averaged mEPSC traces at -60 mV demonstrating the smaller AMPAR mEPSC amplitude in LII neurons (grey) compared to LI neurons (black). **D)** Averaged mEPSC traces at +60 mV demonstrating a smaller NMDAR mEPSC amplitude in lamina II neurons compared to lamina I neurons. Trace scale bar x axes = 100 ms, y axes = 5 pA. All traces are presented as mean (darker line)  $\pm$  standard error (lighter shaded area). **E)** Histograms comparing peak AMPAR mEPSC amplitude (at -60 mV, red) and NMDAR-mediated charge transfer (at +60mV, blue) between lamina I and lamina II neurons.

**A**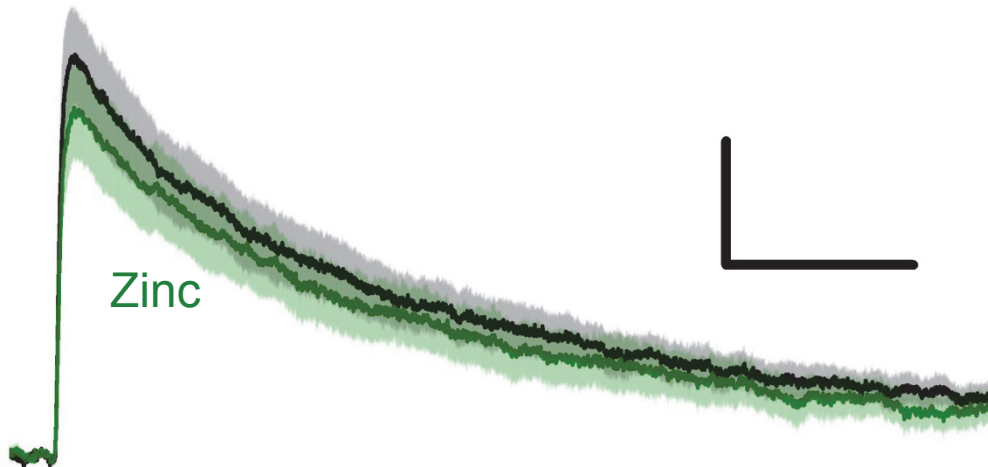**B**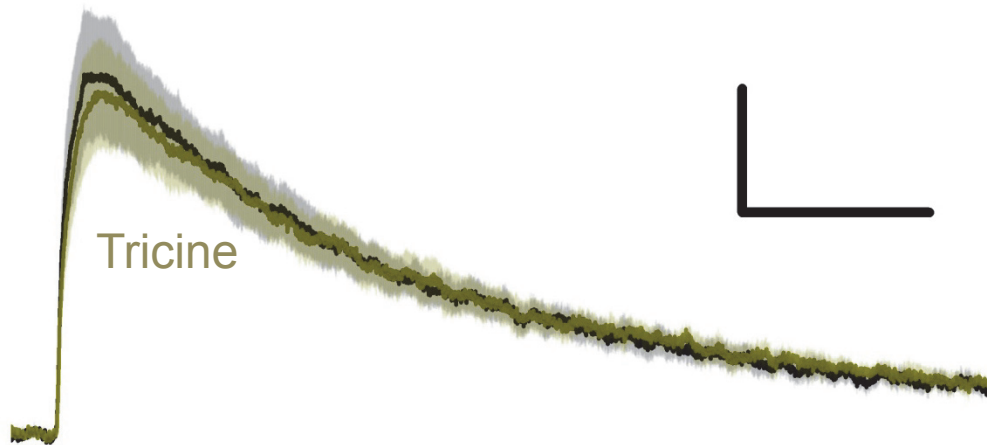

**Supplementary Figure 2: Effects of exogenous and endogenous zinc on mEPSCs in lamina I neurons.**

**A)** In the presence of 10 mM tricine (black), perfusion of 40  $\mu\text{M}$   $\text{ZnCl}_2$  results in 200 nM free extracellular  $\text{Zn}^{2+}$  (green) (Paoletti *et al*, 1997). Administration of 200 nM free  $\text{Zn}^{2+}$  resulted in a small, significant inhibition of mEPSCs in lamina I neurons (*Control*  $Q = 2.50 \pm 0.43$  pC,  $n = 6$ ; *200 nM zinc*  $Q = 2.16 \pm 0.48$  pC,  $n = 6$ ,  $p = 0.025$ ). **B)** Buffering endogenous  $\text{Zn}^{2+}$  with 10 mM tricine (olive green) does not affect mEPSCs. *Control*  $Q = 2.50 \pm 0.30$  pC,  $n = 4$ ; *10 mM tricine*  $Q = 2.52 \pm 0.27$  pC,  $n = 4$ ,  $p = 0.93$ . All traces are presented as mean (darker line)  $\pm$  standard error (lighter shaded area). Trace scale bar x axes = 100 ms, y axes = 5 pA

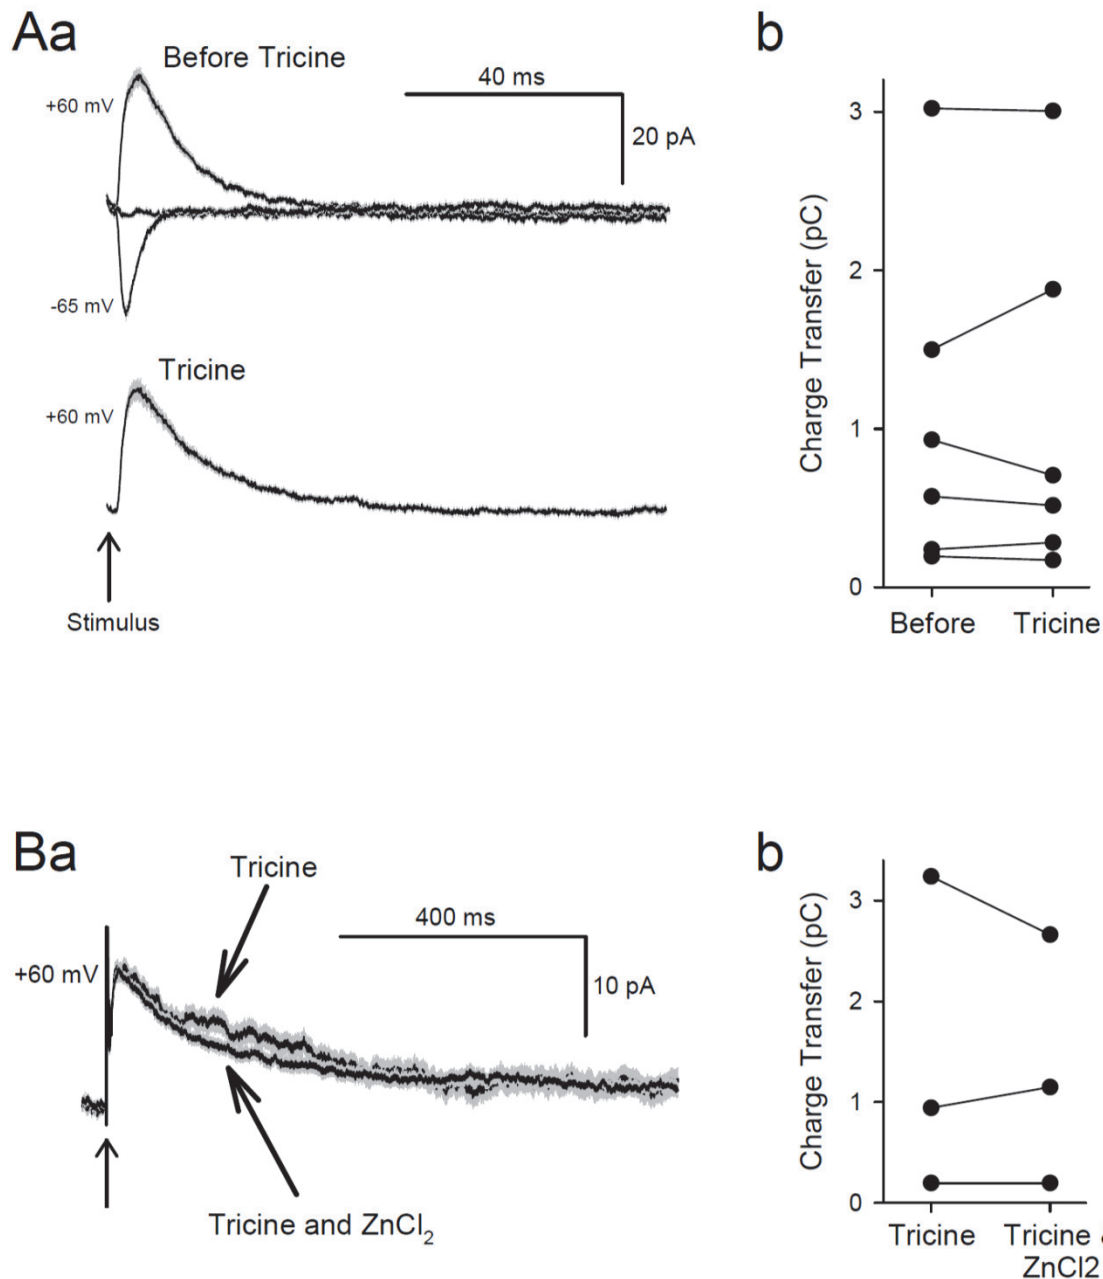

### Supplementary Figure 3: Effects of endogenous and exogenous zinc on uEPSCs in lamina I neurons.

**A)** Buffering endogenous Zn<sup>2+</sup> with 10 mM tricine does not affect uEPSCs. **a)** Top, averaged traces from a lamina I neuron showing successful unitary EPSCs and synaptic failures at +60 mV as well as successful uEPSCs recorded at -65 mV. Bottom, administration of 10 mM tricine had no effect on uEPSC (+60 mV) amplitude or charge transfer for the same cell shown above. **b)** Plot of tricine-induced changes in NMDAR charge transfer in individual neurons demonstrating that tricine had no significant effect on NMDAR charge transfer for uEPSCs. **Ba)** In the presence of 10 mM tricine, perfusion of 40 μM ZnCl<sub>2</sub> results in 200 nM free extracellular Zn<sup>2+</sup> (Paoletti *et al*, 1997). Averaged uEPSC traces from a lamina I neuron showing that administration of 200 nM free Zn<sup>2+</sup> resulted in a small inhibition (18% reduction in charge transfer). **b)** Plot of Zn<sup>2+</sup>-induced changes in NMDAR charge transfer in individual neurons demonstrating that the inhibitory effect of Zn<sup>2+</sup> on NMDAR responses was only observed in one of three lamina I neurons.
